# Supplementary material for: Anomalous red emission with competition and coexistence of defect and band edge emission in photo-electrochemically active (Zn0.97Ga0.03)(O0.95N0.05) solid solution
Source: Royal Society of Chemistry journal article supplement (doi:10.1039/c6ra21078c), 2016-01-01
Supplement: c6ra21078c1.pdf [file c6ra21078c1.pdf]

## SUPPLEMENTARY INFORMATION

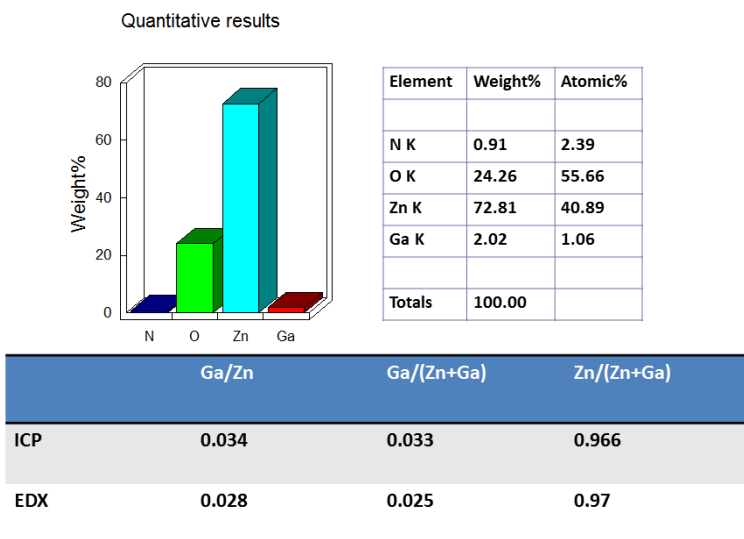

Figure 1: Elemental analysis of as prepared ZnO:GaN solid solution samples by Energy dispersive X-ray analysis (EDAX) and ICP.

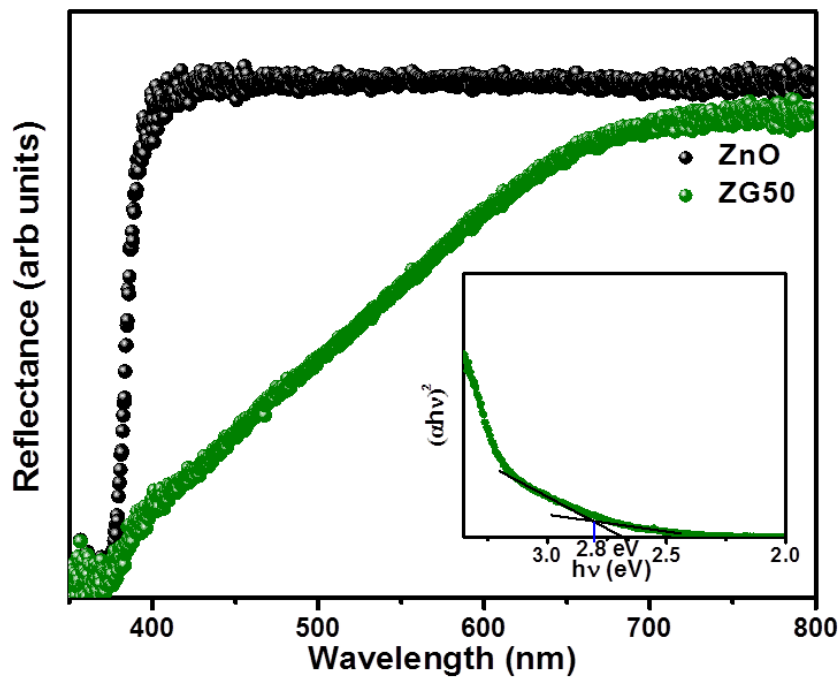

Figure 2: Diffuse reflectance spectroscopy of as prepared sample, Inset shows Tauc plot.
